# Supplementary material for: A polystyrene-based ESIPT fluorescent polymeric probe for highly sensitive detection of chromium(vi) ions and protein staining
Source: Royal Society of Chemistry journal article supplement (doi:10.1039/d3ra02698a), 2023-01-01
Supplement: d3ra02698a1.pdf [file d3ra02698a1.pdf]

*Supporting Information for*

**A polystyrene-based ESIPT fluorescent polymeric probe for highly sensitive detection of chromium (VI) ions and protein staining**

Xiaoling Qin, Guoqiang Zhou, Pan Ma, Jiaoyun Xia, Fuchun Gong\*, Lusen Chen and Lujie Xu

*College of Chemistry and Chemical Engineering, Changsha University of Science and Technology, Changsha, 410114, P. R. China*

---

\*Corresponding authors, Tel: +86-0731-85258733;

E-mail addresses: gongfc139@163.com (F.-C. Gong)

**Table of Contents**

|                                                                                                           |            |
|-----------------------------------------------------------------------------------------------------------|------------|
| <b>1. Synthesis and Characterization of f-PP.....</b>                                                     | <b>2-4</b> |
| <b>2. UV-visible absorption and fluorescence spectra of f-PP with the addition of competing ions.....</b> | <b>5-6</b> |
| <b>3. Determination of fluorescence quantum yield.....</b>                                                | <b>7</b>   |

**1. Synthesis and Characterization of f-PP**

### ***1.1. Synthesis of acetyl polystyrene***

The acetyl polystyrene was synthesized according to the reported method with minor modification [1]. Briefly, dry polystyrene (0.5 g) was placed in a three-neck flask containing 10 mL CS<sub>2</sub> and soaked for 12 h. An appropriate amount of AlCl<sub>3</sub> (0.774 g), CS<sub>2</sub> (10 mL) and AC (0.585 g) were added to the swollen granules. After mechanical stirring for 10 min, the mixture was circulated and cooled in a oil bath at 80-85 °C for 5 h. Then, the resulting mixture was washed with 3% dilute hydrochloric acid, deionized water and anhydrous ethanol. Finally, the product was dried in a vacuum drying chamber at 50°C to obtain the target compounds. Yield: 74.6%.

### ***1.2. Synthesis of ESIPT fluorescent polymer (f-PP)***

ESIPT fluorescent polymer probe f-PP was synthesized according to the reported method in the literature [2]. Briefly, 4-(diethylamino)-2-hydroxybenzaldehyde (1.36g, 10 mM), Acetylated polystyrene (5.6g), malonitrile (0.67g, 10.5 mM) and ammonium acetate (5.4 g, 70 mM) were dissolved in 30 mL ethanol. The mixture reacted by refluxing under stirring for 4 h. After cooling to room temperature, the reaction mixture was filtered and washed with distilled water, acquiring the crude products. Finally, the resulted product is further recrystallization from ethanol and dried at 50 °C to afford faint yellow crystal. (3.1 g, 83.2%). <sup>1</sup>H NMR (400 MHz, DMSO-*d*<sub>6</sub>) δ 8.73 (s, 1H), 8.71 (s, 1H), 7.99 (s, 2H), 7.43 (s, 5H), 6.93 (dd, *J* = 9.8, 2.6 Hz, 2H), 6.74 – 6.64 (m, 3H), 3.76 – 3.30 (m, 39H), 3.13 – 2.72 (m, 9H), 2.58 (d, *J* = 3.6 Hz, 40H), 1.95 (s, 7H), 1.52 – 1.00 (m, 24H). <sup>13</sup>C NMR (101 MHz, DMSO-*d*<sub>6</sub>) δ 197.61, 162.76, 135.12, 40.92, 40.33 (d, *J* = 21.1 Hz), 40.14 – 39.57 (m), 39.39, 35.46 (d, *J* = 152.9 Hz), 31.20, 26.86.

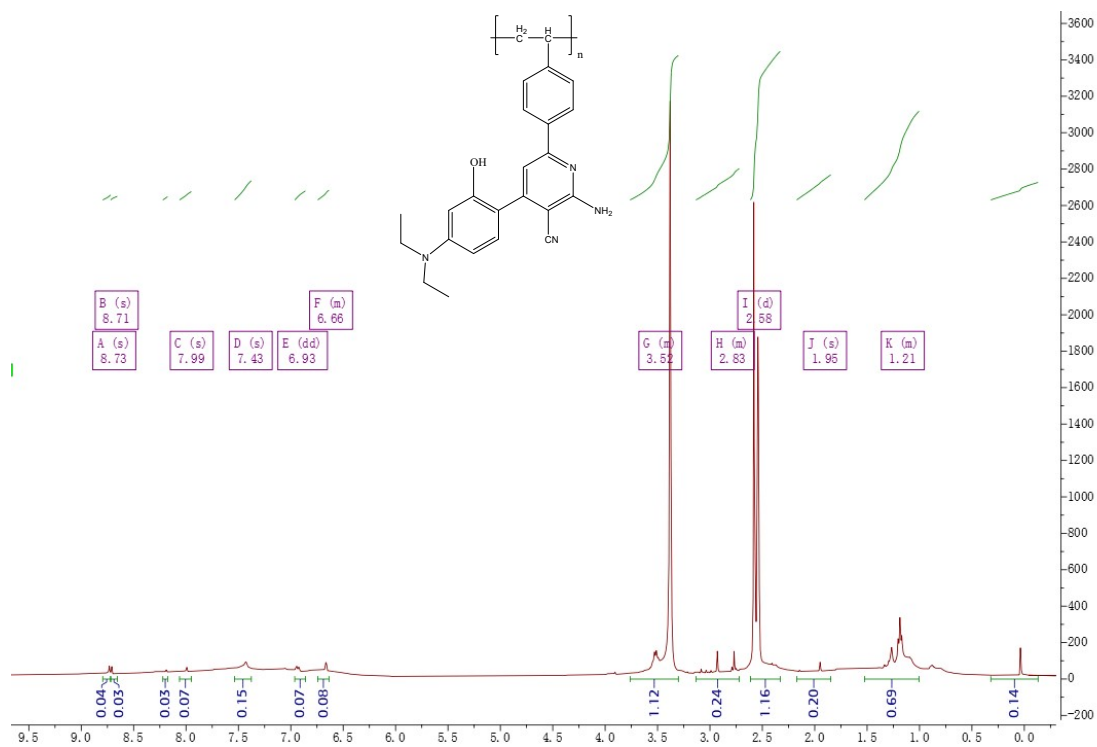

**Fig. S1-1** <sup>1</sup>H NMR characteristic spectra of f-PP

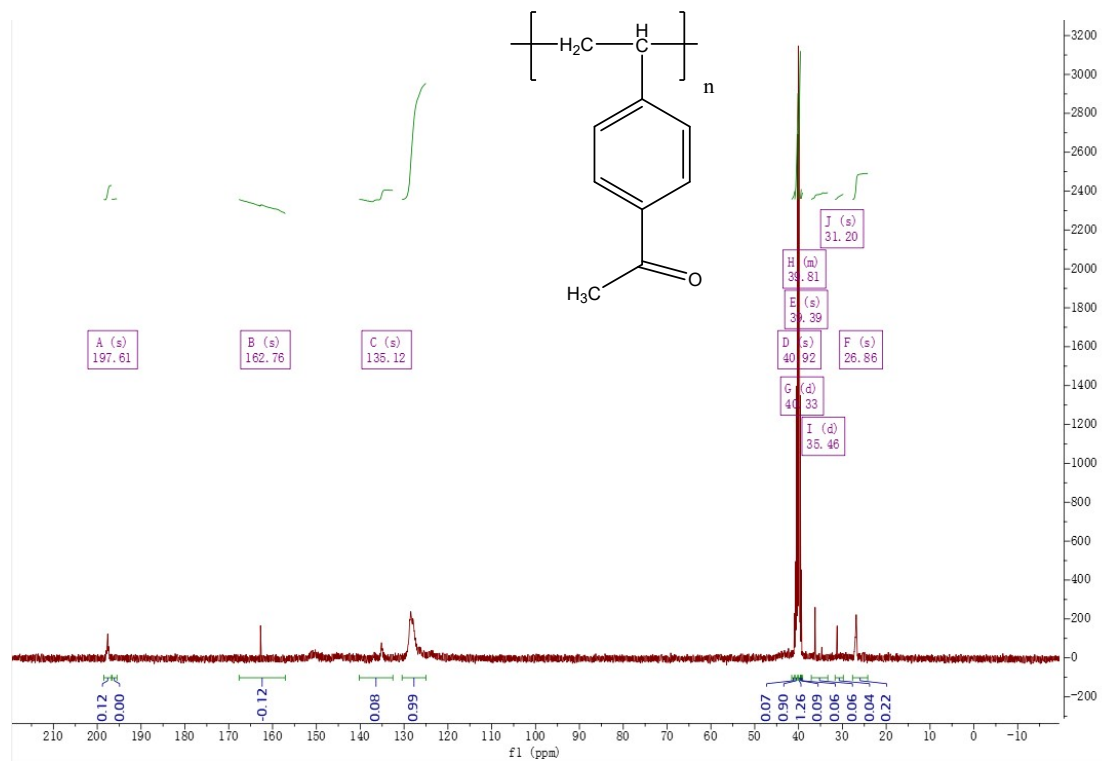

Fig. S1-2 <sup>13</sup>CNMR characteristic spectra of X-PS

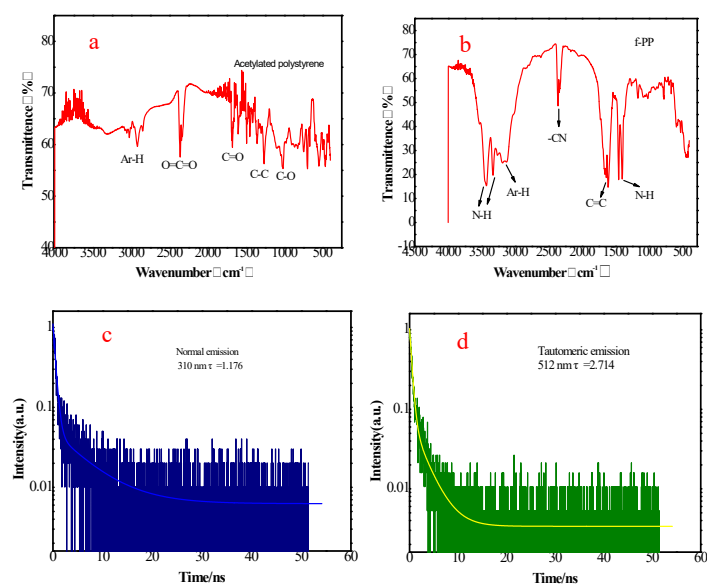

**Fig. S2** FTIR spectra and fluorescence decay curves of f-PP. (a), (b) are the FTIR spectra of acetyl polystyrene and f-PP, respectively; (c), (d) are the fluorescence decay times of f-PP at 310 nm and 512 nm, respectively. The concentrations of f-PP were 20  $\mu\text{g}\cdot\text{L}^{-1}$ .

## UV-visible absorption of f-PP with the addition of competing ions

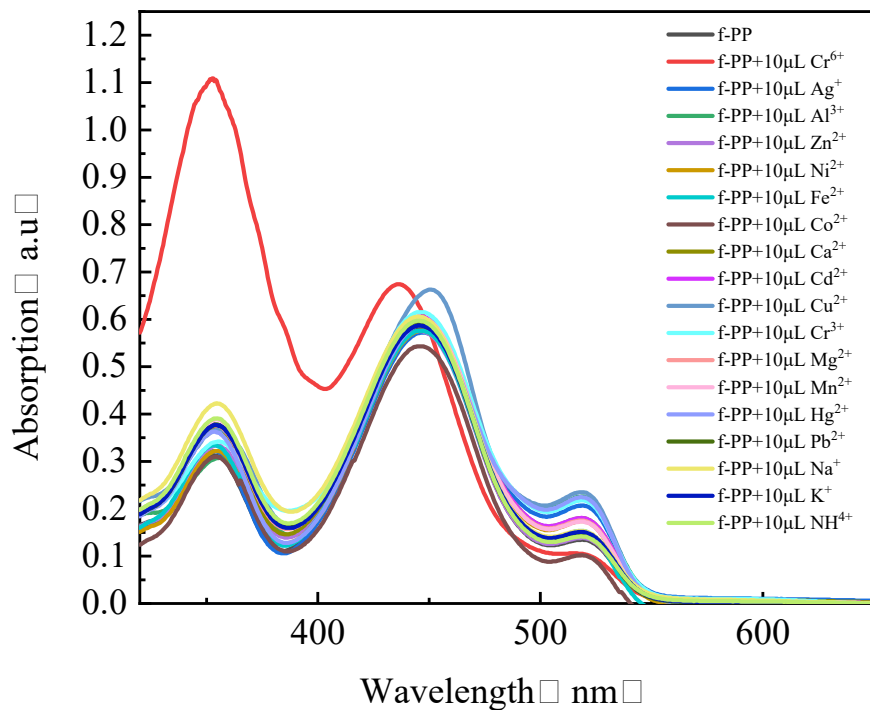

**Fig. S3** UV-visible absorption of f-PP with the addition of competing ions in DMF-PBS mixed system(4/6, v/v, pH 7.2)

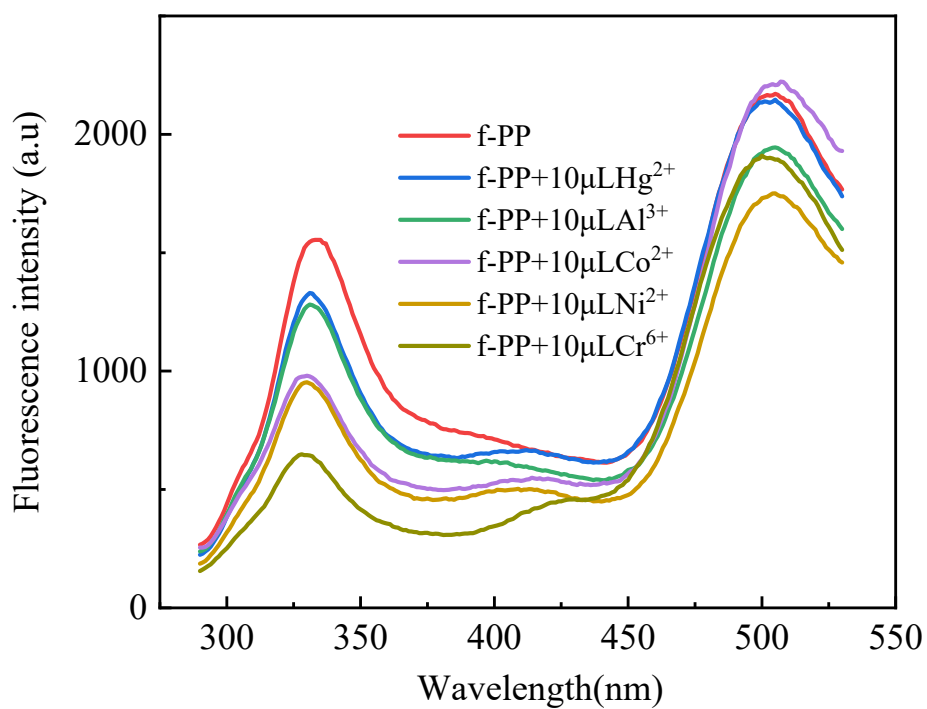

**Fig. S4** fluorescence spectra of f-PP with the addition of competing ions in DMF-PBS mixed system(4/6, v/v, pH 7.2)

## 2. Determination of fluorescence quantum yield

The fluorescence quantum yield ( $\Phi_f$ ) of f-PP in DMF-PBS mixed system (4/6, v/v, pH 7.2) was determined using quinine sulfate ( $\Phi_f = 0.55$  at 360 nm) in sulfuric acid (0.50 mol.L<sup>-1</sup>,  $\eta = 1.47$ ) as the standard substance. The absolute  $\Phi_f$  values were calculated corresponding to the following equation:

$$\Phi_u = \Phi_s (I_u/I_s) (A_s/A_u) (\eta_u^2/\eta_s^2)$$

$\Phi$  is fluorescence quantum yield;  $I$  is the measured integrated fluorescence intensity;  $A$  is the optical density measured at the selected excitation wavelength;  $\eta$  is the refractive index. The subscript “s” refers to the standard  $\Phi_f$  of the referenced quinine sulfate. The subscript “u” refers to the unknown  $\Phi_f$  of the ESIPT fluorescent probe f-PP. In order to minimize re-absorption effect, absorbance in the 1.0 cm fluorescence cuvette was kept under 0.1 at the excitation wavelength of 360 nm.



## References

- 1 Feng, X.; Yang, X.; Li, M.; Qin, Y.; Li, H.; Xie, Y., Production and method optimization of fluorescent polystyrene. *J. Mol. Struct.* 2021, 1243, 130746.
- 2 Ma, P.; Gong, F.; Zhu, H.; Qian, Y.; He, L.; Xia, J.; Cao, Z., Partnered Excited-State Intermolecular Proton Transfer Fluorescence (P-ESIPT) Signaling for Nitrate Sensing and High-Resolution Cell-Imaging. *Molecules* 2022, 27 (16), 5164.
